# Supplementary material for: Pollution Characteristics and Spatial Distribution of Heavy Metals in Coal-Bearing Sandstone Soil: A Case Study of Coal Mine Area in Southwest China
Source: MDPI journal article supplement (doi:10.3390/ijerph19116493), 2022-05-26
Supplement: s1 [file s1]

**Table S1.** The certified and test values of standard samples and the detection limits of each element.

|                  | Cr     | Ni     | Cu     | Zn     | As        | Cd          | Hg          | Pb     | Mn       | TFe <sub>2</sub> O <sub>3</sub> |
|------------------|--------|--------|--------|--------|-----------|-------------|-------------|--------|----------|---------------------------------|
|                  | mg/kg  | mg/kg  | mg/kg  | mg/kg  | mg/kg     | mg/kg       | mg/kg       | mg/kg  | mg/kg    | wt%                             |
| Certified value  | 80 ± 5 | 38 ± 2 | 35 ± 2 | 96 ± 4 | 9.3 ± 0.8 | 0.28 ± 0.02 | 0.15 ± 0.02 | 32 ± 3 | 760 ± 16 | 5.44 ± 0.15                     |
| Test value       | 78.18  | 37.06  | 34.11  | 93.25  | 9.46      | 0.29        | 0.15        | 33.77  | 770.53   | 5.38                            |
| Detection limits | 4      | 0.2    | 0.5    | 10     | 0.01      | 0.021       | 0.002       | 0.7    | 0.02     | 0.0009                          |

**Table S2.** Six classes of the geoaccumulation index.

| Class | Value             | Soil Dust Quality                         |
|-------|-------------------|-------------------------------------------|
| 0     | $I_{geo} \leq 0$  | Practically uncontaminated                |
| 1     | $0 < I_{geo} < 1$ | Uncontaminated to moderately contaminated |
| 2     | $1 < I_{geo} < 2$ | Moderately contaminated                   |
| 3     | $2 < I_{geo} < 3$ | Moderately to heavily contaminated        |
| 4     | $3 < I_{geo} < 4$ | Heavily contaminated                      |
| 5     | $4 < I_{geo} < 5$ | Heavily to extremely contaminated         |
| 6     | $5 < I_{geo}$     | Extremely contaminated                    |

**Table S3.** pH and concentrations of soil samples.

| No   | pH   | Cr    | Ni     | Cu    | Zn     | As    | Cd    | Hg    | Pb    | Mn       | Fe   |
|------|------|-------|--------|-------|--------|-------|-------|-------|-------|----------|------|
|      |      | mg/kg | mg/kg  | mg/kg | mg/kg  | mg/kg | mg/kg | mg/kg | mg/kg | mg/kg    | wt%  |
| TY01 | 7.11 | 40.97 | 471.61 | 30.33 | 346.68 | 7.34  | 2.51  | 0.10  | 27.29 | 14314.45 | 6.18 |
| TY02 | 7.14 | 67.76 | 33.06  | 59.11 | 180.88 | 29.27 | 0.83  | 0.31  | 91.01 | 476.74   | 3.83 |
| TY03 | 7.68 | 40.19 | 17.52  | 38.64 | 102.27 | 10.08 | 0.93  | 0.18  | 64.95 | 650.22   | 2.49 |
| TY04 | 6.15 | 58.67 | 17.99  | 20.33 | 72.19  | 5.32  | 0.30  | 0.12  | 23.63 | 402.75   | 2.71 |
| TY05 | 6.21 | 65.33 | 30.20  | 29.69 | 123.78 | 7.59  | 0.41  | 0.15  | 29.87 | 832.18   | 3.89 |
| TY06 | 8.93 | 74.16 | 35.49  | 34.21 | 95.71  | 9.86  | 0.43  | 0.15  | 28.97 | 963.19   | 4.16 |
| TY07 | 6.00 | 62.81 | 24.80  | 22.01 | 75.66  | 5.03  | 0.23  | 0.09  | 20.12 | 649.00   | 3.78 |
| TY08 | 8.87 | 82.09 | 38.25  | 38.63 | 99.05  | 7.45  | 0.31  | 0.16  | 28.46 | 777.59   | 4.56 |
| TY09 | 7.47 | 72.34 | 28.96  | 30.93 | 92.02  | 5.03  | 0.38  | 0.14  | 34.66 | 729.07   | 4.33 |
| TY10 | 4.88 | 47.15 | 18.02  | 18.24 | 58.36  | 5.67  | 0.24  | 0.10  | 24.04 | 439.14   | 3.22 |
| TY11 | 6.74 | 80.97 | 35.79  | 36.35 | 93.88  | 10.14 | 0.34  | 0.14  | 25.23 | 788.51   | 4.80 |
| TY12 | 8.58 | 59.75 | 24.25  | 20.72 | 77.15  | 6.96  | 0.26  | 0.09  | 19.99 | 549.53   | 4.08 |
| TY13 | 8.57 | 54.55 | 23.40  | 24.82 | 94.51  | 6.18  | 0.34  | 0.10  | 22.50 | 719.36   | 3.63 |
| TY14 | 7.47 | 58.68 | 24.56  | 26.63 | 87.87  | 6.64  | 0.51  | 0.10  | 26.84 | 837.03   | 3.84 |
| TY15 | 8.66 | 64.63 | 28.64  | 31.54 | 85.13  | 8.02  | 0.43  | 0.13  | 28.64 | 911.03   | 4.05 |
| TY16 | 5.61 | 79.18 | 36.05  | 41.02 | 107.09 | 7.94  | 0.48  | 0.15  | 31.65 | 986.24   | 4.36 |
| TY17 | 5.04 | 78.30 | 26.10  | 26.08 | 89.67  | 6.81  | 0.27  | 0.14  | 17.45 | 258.39   | 3.33 |
| TY18 | 5.42 | 62.62 | 21.17  | 23.69 | 67.04  | 5.47  | 0.27  | 0.12  | 19.96 | 274.16   | 2.74 |
| TY19 | 6.71 | 61.94 | 22.84  | 29.61 | 77.97  | 6.49  | 0.36  | 0.14  | 21.90 | 339.66   | 2.85 |
| TY20 | 7.15 | 59.09 | 23.45  | 34.75 | 101.12 | 7.02  | 0.38  | 0.15  | 28.03 | 467.04   | 3.29 |
| TY21 | 9.01 | 50.88 | 20.45  | 20.68 | 72.79  | 7.04  | 0.31  | 0.20  | 25.52 | 616.25   | 3.25 |
| TY22 | 6.05 | 54.90 | 22.04  | 20.97 | 76.83  | 5.25  | 0.30  | 0.09  | 23.73 | 679.33   | 3.80 |
| TY23 | 8.26 | 45.06 | 17.23  | 16.92 | 51.57  | 6.41  | 0.21  | 0.06  | 19.08 | 573.79   | 2.93 |
| TY24 | 6.82 | 45.49 | 17.80  | 15.76 | 69.50  | 5.72  | 0.34  | 0.10  | 27.77 | 575.00   | 3.54 |
| TY25 | 7.40 | 55.10 | 22.46  | 26.25 | 79.57  | 6.44  | 0.32  | 0.13  | 28.29 | 807.92   | 3.97 |
| TY26 | 8.69 | 78.68 | 37.23  | 36.30 | 96.89  | 11.02 | 0.38  | 0.14  | 26.52 | 940.14   | 5.17 |
| TY27 | 7.69 | 46.48 | 15.58  | 22.52 | 75.53  | 6.21  | 0.48  | 0.20  | 37.39 | 1504.23  | 3.48 |

|      |      |       |       |       |        |       |      |      |       |         |      |
|------|------|-------|-------|-------|--------|-------|------|------|-------|---------|------|
| TY28 | 5.38 | 46.83 | 16.77 | 7.66  | 46.06  | 6.68  | 0.26 | 0.13 | 25.06 | 334.81  | 2.66 |
| TY29 | 6.04 | 65.55 | 24.50 | 27.23 | 80.44  | 6.97  | 0.35 | 0.19 | 21.88 | 363.93  | 3.26 |
| TY30 | 8.34 | 50.02 | 21.71 | 20.54 | 65.03  | 8.06  | 0.38 | 0.10 | 25.34 | 656.28  | 3.18 |
| TY31 | 8.72 | 55.84 | 29.12 | 36.60 | 82.06  | 19.14 | 0.52 | 0.24 | 36.14 | 627.77  | 2.81 |
| TY32 | 8.84 | 85.37 | 44.15 | 33.57 | 92.37  | 20.05 | 0.34 | 0.15 | 23.05 | 581.74  | 4.33 |
| TY33 | 8.11 | 47.55 | 22.70 | 20.48 | 63.73  | 11.82 | 0.31 | 0.16 | 22.25 | 472.92  | 2.72 |
| TY34 | 7.78 | 56.04 | 23.00 | 23.46 | 76.13  | 6.58  | 0.32 | 0.14 | 25.62 | 316.68  | 3.09 |
| TY35 | 6.41 | 49.93 | 20.22 | 21.94 | 72.20  | 6.47  | 0.28 | 0.10 | 22.93 | 397.59  | 3.15 |
| TY36 | 7.98 | 42.33 | 18.16 | 15.57 | 48.16  | 9.89  | 0.25 | 0.11 | 19.05 | 424.10  | 2.43 |
| TY37 | 8.73 | 34.52 | 15.36 | 12.49 | 39.04  | 11.60 | 0.26 | 0.11 | 16.80 | 537.09  | 2.19 |
| TY38 | 8.97 | 44.15 | 26.38 | 43.48 | 130.92 | 15.50 | 0.47 | 0.10 | 69.38 | 1729.86 | 2.31 |
| TY39 | 6.07 | 63.04 | 20.62 | 13.38 | 80.47  | 6.14  | 0.29 | 0.11 | 23.42 | 735.19  | 4.25 |
| TY40 | 9.05 | 64.75 | 32.34 | 32.97 | 81.92  | 15.06 | 0.44 | 0.21 | 28.43 | 719.85  | 3.62 |
| TY41 | 9.00 | 66.17 | 31.04 | 32.90 | 77.94  | 12.28 | 0.34 | 0.21 | 28.31 | 665.44  | 3.84 |
| TY42 | 8.89 | 75.09 | 39.33 | 33.19 | 77.37  | 13.86 | 0.38 | 0.20 | 29.99 | 722.64  | 3.90 |
| TY43 | 8.88 | 86.43 | 45.34 | 34.20 | 78.43  | 10.16 | 0.36 | 0.19 | 29.55 | 856.56  | 4.13 |
| TY44 | 8.70 | 67.77 | 33.76 | 34.79 | 77.88  | 16.52 | 0.38 | 0.27 | 31.90 | 739.38  | 3.80 |
| TY45 | 8.71 | 77.06 | 44.80 | 34.05 | 79.84  | 19.97 | 0.40 | 0.27 | 29.82 | 735.19  | 3.74 |
| TY46 | 8.73 | 71.38 | 40.77 | 36.44 | 80.79  | 20.07 | 0.37 | 0.27 | 29.75 | 679.39  | 3.53 |
| TY47 | 8.74 | 49.87 | 30.56 | 32.32 | 71.27  | 23.98 | 0.41 | 0.31 | 27.31 | 565.00  | 2.88 |
| TY48 | 8.54 | 50.50 | 35.22 | 40.27 | 86.78  | 28.06 | 0.53 | 0.43 | 33.33 | 537.09  | 2.97 |
| TY49 | 8.72 | 53.97 | 34.97 | 39.07 | 82.10  | 24.82 | 0.49 | 0.40 | 33.15 | 541.28  | 3.15 |
| TY50 | 5.78 | 54.91 | 22.42 | 20.20 | 71.85  | 6.74  | 0.22 | 0.13 | 17.44 | 629.17  | 3.33 |
| TY51 | 6.48 | 55.83 | 23.49 | 22.29 | 75.01  | 7.06  | 0.29 | 0.10 | 23.74 | 599.87  | 3.81 |
| TY52 | 5.51 | 58.00 | 23.38 | 21.76 | 75.34  | 6.12  | 0.33 | 0.10 | 24.39 | 334.81  | 3.71 |
| TY53 | 5.70 | 46.15 | 20.37 | 13.77 | 65.00  | 6.02  | 0.28 | 0.13 | 18.61 | 503.61  | 3.03 |
| TY54 | 8.32 | 56.36 | 26.15 | 29.62 | 104.60 | 7.11  | 0.48 | 0.18 | 33.92 | 768.67  | 3.50 |

**Table S4.** The EF index values.

| No   | Cr   | Ni   | Cu   | Zn   | As   | Cd    | Hg   | Pb   |
|------|------|------|------|------|------|-------|------|------|
| TY01 | 0.32 | 8.34 | 0.64 | 2.22 | 0.31 | 11.93 | 0.72 | 0.50 |
| TY02 | 0.85 | 0.94 | 2.01 | 1.87 | 2.01 | 6.41  | 3.69 | 2.69 |
| TY03 | 0.78 | 0.77 | 2.02 | 1.63 | 1.06 | 11.04 | 3.34 | 2.95 |
| TY04 | 1.04 | 0.72 | 0.97 | 1.05 | 0.52 | 3.20  | 1.94 | 0.98 |
| TY05 | 0.81 | 0.85 | 0.99 | 1.26 | 0.51 | 3.10  | 1.71 | 0.87 |
| TY06 | 0.86 | 0.93 | 1.07 | 0.91 | 0.62 | 3.03  | 1.60 | 0.79 |
| TY07 | 0.80 | 0.72 | 0.76 | 0.79 | 0.35 | 1.78  | 1.06 | 0.60 |
| TY08 | 0.87 | 0.92 | 1.10 | 0.86 | 0.43 | 1.97  | 1.57 | 0.71 |
| TY09 | 0.81 | 0.73 | 0.93 | 0.84 | 0.31 | 2.61  | 1.50 | 0.91 |
| TY10 | 0.71 | 0.61 | 0.74 | 0.72 | 0.46 | 2.21  | 1.37 | 0.84 |
| TY11 | 0.81 | 0.81 | 0.98 | 0.77 | 0.55 | 2.09  | 1.37 | 0.59 |
| TY12 | 0.71 | 0.65 | 0.66 | 0.75 | 0.45 | 1.89  | 0.96 | 0.55 |
| TY13 | 0.72 | 0.70 | 0.89 | 1.03 | 0.45 | 2.77  | 1.30 | 0.70 |
| TY14 | 0.74 | 0.70 | 0.90 | 0.91 | 0.45 | 3.91  | 1.19 | 0.79 |
| TY15 | 0.77 | 0.77 | 1.01 | 0.83 | 0.52 | 3.13  | 1.49 | 0.80 |
| TY16 | 0.88 | 0.90 | 1.22 | 0.97 | 0.48 | 3.21  | 1.57 | 0.82 |
| TY17 | 1.13 | 0.86 | 1.02 | 1.07 | 0.54 | 2.41  | 1.94 | 0.59 |
| TY18 | 1.10 | 0.84 | 1.12 | 0.97 | 0.52 | 2.89  | 2.02 | 0.82 |
| TY19 | 1.05 | 0.87 | 1.35 | 1.08 | 0.60 | 3.68  | 2.20 | 0.87 |

|      |      |      |      |      |      |      |      |      |
|------|------|------|------|------|------|------|------|------|
| TY20 | 0.87 | 0.78 | 1.37 | 1.22 | 0.56 | 3.36 | 2.06 | 0.96 |
| TY21 | 0.75 | 0.69 | 0.83 | 0.89 | 0.57 | 2.80 | 2.80 | 0.89 |
| TY22 | 0.70 | 0.63 | 0.72 | 0.80 | 0.36 | 2.35 | 1.10 | 0.71 |
| TY23 | 0.74 | 0.64 | 0.75 | 0.70 | 0.57 | 2.15 | 0.99 | 0.74 |
| TY24 | 0.62 | 0.55 | 0.58 | 0.78 | 0.42 | 2.82 | 1.26 | 0.89 |
| TY25 | 0.67 | 0.62 | 0.86 | 0.79 | 0.43 | 2.39 | 1.45 | 0.81 |
| TY26 | 0.73 | 0.79 | 0.91 | 0.74 | 0.56 | 2.14 | 1.19 | 0.58 |
| TY27 | 0.64 | 0.49 | 0.84 | 0.86 | 0.47 | 4.10 | 2.60 | 1.22 |
| TY28 | 0.85 | 0.69 | 0.38 | 0.69 | 0.66 | 2.84 | 2.16 | 1.07 |
| TY29 | 0.97 | 0.82 | 1.09 | 0.98 | 0.56 | 3.18 | 2.62 | 0.76 |
| TY30 | 0.76 | 0.75 | 0.84 | 0.81 | 0.67 | 3.52 | 1.46 | 0.90 |
| TY31 | 0.96 | 1.13 | 1.70 | 1.16 | 1.79 | 5.47 | 3.80 | 1.46 |
| TY32 | 0.95 | 1.11 | 1.01 | 0.85 | 1.22 | 2.30 | 1.57 | 0.60 |
| TY33 | 0.84 | 0.91 | 0.98 | 0.93 | 1.14 | 3.33 | 2.71 | 0.92 |
| TY34 | 0.87 | 0.81 | 0.99 | 0.98 | 0.56 | 3.07 | 2.12 | 0.94 |
| TY35 | 0.76 | 0.70 | 0.91 | 0.91 | 0.54 | 2.66 | 1.42 | 0.82 |
| TY36 | 0.84 | 0.82 | 0.83 | 0.78 | 1.07 | 3.08 | 2.02 | 0.89 |
| TY37 | 0.76 | 0.77 | 0.74 | 0.70 | 1.39 | 3.42 | 2.26 | 0.87 |
| TY38 | 0.92 | 1.25 | 2.44 | 2.24 | 1.76 | 5.97 | 1.98 | 3.39 |
| TY39 | 0.71 | 0.53 | 0.41 | 0.75 | 0.38 | 2.01 | 1.17 | 0.62 |
| TY50 | 0.79 | 0.73 | 0.79 | 0.85 | 0.53 | 1.94 | 1.70 | 0.59 |
| TY51 | 0.71 | 0.67 | 0.76 | 0.78 | 0.49 | 2.20 | 1.20 | 0.70 |
| TY52 | 0.75 | 0.69 | 0.76 | 0.80 | 0.43 | 2.60 | 1.27 | 0.74 |
| TY53 | 0.73 | 0.74 | 0.59 | 0.85 | 0.52 | 2.69 | 1.91 | 0.69 |
| TY54 | 0.78 | 0.82 | 1.10 | 1.19 | 0.53 | 4.03 | 2.27 | 1.10 |

**Table S5.** The geoaccumulation index ( $I_{geo}$ ).

| No   | Cr    | Ni    | Cu    | Zn    | As    | Cd   | Hg    | Pb    |
|------|-------|-------|-------|-------|-------|------|-------|-------|
| TY01 | -1.16 | 3.55  | -0.16 | 1.64  | -1.20 | 4.06 | 0.01  | -0.52 |
| TY02 | -0.43 | -0.29 | 0.80  | 0.70  | 0.80  | 2.48 | 1.67  | 1.22  |
| TY03 | -1.19 | -1.20 | 0.19  | -0.12 | -0.74 | 2.64 | 0.90  | 0.74  |
| TY04 | -0.64 | -1.17 | -0.74 | -0.62 | -1.66 | 0.98 | 0.24  | -0.72 |
| TY05 | -0.49 | -0.42 | -0.19 | 0.15  | -1.15 | 1.45 | 0.58  | -0.38 |
| TY06 | -0.30 | -0.19 | 0.01  | -0.22 | -0.77 | 1.52 | 0.58  | -0.43 |
| TY07 | -0.54 | -0.70 | -0.62 | -0.56 | -1.74 | 0.61 | -0.15 | -0.95 |
| TY08 | -0.16 | -0.08 | 0.19  | -0.17 | -1.17 | 1.02 | 0.69  | -0.45 |
| TY09 | -0.34 | -0.48 | -0.13 | -0.27 | -1.74 | 1.36 | 0.55  | -0.17 |
| TY10 | -0.96 | -1.16 | -0.89 | -0.93 | -1.57 | 0.69 | -0.01 | -0.70 |
| TY11 | -0.18 | -0.17 | 0.10  | -0.25 | -0.73 | 1.18 | 0.57  | -0.63 |
| TY12 | -0.61 | -0.73 | -0.71 | -0.53 | -1.27 | 0.81 | -0.17 | -0.96 |
| TY13 | -0.75 | -0.79 | -0.45 | -0.24 | -1.44 | 1.19 | 0.10  | -0.79 |
| TY14 | -0.64 | -0.72 | -0.35 | -0.34 | -1.34 | 1.77 | 0.04  | -0.54 |
| TY15 | -0.50 | -0.49 | -0.10 | -0.39 | -1.07 | 1.52 | 0.44  | -0.45 |
| TY16 | -0.21 | -0.16 | 0.27  | -0.06 | -1.08 | 1.66 | 0.62  | -0.30 |
| TY17 | -0.22 | -0.63 | -0.38 | -0.31 | -1.30 | 0.86 | 0.54  | -1.16 |
| TY18 | -0.55 | -0.93 | -0.52 | -0.73 | -1.62 | 0.84 | 0.32  | -0.97 |
| TY19 | -0.56 | -0.82 | -0.20 | -0.51 | -1.37 | 1.25 | 0.50  | -0.83 |
| TY20 | -0.63 | -0.78 | 0.04  | -0.14 | -1.26 | 1.33 | 0.61  | -0.48 |
| TY21 | -0.85 | -0.98 | -0.71 | -0.61 | -1.26 | 1.05 | 1.04  | -0.61 |

|      |       |       |       |       |       |      |       |       |
|------|-------|-------|-------|-------|-------|------|-------|-------|
| TY22 | -0.74 | -0.87 | -0.69 | -0.53 | -1.68 | 1.02 | -0.08 | -0.72 |
| TY23 | -1.02 | -1.23 | -1.00 | -1.11 | -1.39 | 0.51 | -0.62 | -1.03 |
| TY24 | -1.01 | -1.18 | -1.11 | -0.68 | -1.56 | 1.18 | 0.01  | -0.49 |
| TY25 | -0.73 | -0.85 | -0.37 | -0.48 | -1.38 | 1.10 | 0.37  | -0.46 |
| TY26 | -0.22 | -0.12 | 0.10  | -0.20 | -0.61 | 1.33 | 0.47  | -0.56 |
| TY27 | -0.98 | -1.37 | -0.59 | -0.56 | -1.44 | 1.69 | 1.03  | -0.06 |
| TY28 | -0.97 | -1.27 | -2.15 | -1.27 | -1.33 | 0.78 | 0.37  | -0.64 |
| TY29 | -0.48 | -0.72 | -0.32 | -0.47 | -1.27 | 1.23 | 0.94  | -0.83 |
| TY30 | -0.87 | -0.89 | -0.72 | -0.78 | -1.06 | 1.34 | 0.06  | -0.62 |
| TY31 | -0.71 | -0.47 | 0.11  | -0.44 | 0.19  | 1.80 | 1.27  | -0.11 |
| TY32 | -0.10 | 0.13  | -0.01 | -0.27 | 0.25  | 1.17 | 0.62  | -0.76 |
| TY33 | -0.94 | -0.83 | -0.73 | -0.80 | -0.51 | 1.04 | 0.74  | -0.81 |
| TY34 | -0.71 | -0.81 | -0.53 | -0.55 | -1.35 | 1.10 | 0.56  | -0.61 |
| TY35 | -0.87 | -1.00 | -0.63 | -0.62 | -1.38 | 0.93 | 0.01  | -0.77 |
| TY36 | -1.11 | -1.15 | -1.12 | -1.21 | -0.76 | 0.76 | 0.15  | -1.03 |
| TY37 | -1.41 | -1.39 | -1.44 | -1.51 | -0.53 | 0.77 | 0.16  | -1.22 |
| TY38 | -1.05 | -0.61 | 0.36  | 0.23  | -0.12 | 1.65 | 0.05  | 0.83  |
| TY39 | -0.54 | -0.97 | -1.34 | -0.47 | -1.45 | 0.96 | 0.17  | -0.74 |
| TY50 | -0.74 | -0.85 | -0.75 | -0.63 | -1.32 | 0.56 | 0.36  | -1.16 |
| TY51 | -0.71 | -0.78 | -0.60 | -0.57 | -1.25 | 0.93 | 0.05  | -0.72 |
| TY52 | -0.66 | -0.79 | -0.64 | -0.56 | -1.46 | 1.13 | 0.09  | -0.68 |
| TY53 | -0.99 | -0.99 | -1.30 | -0.78 | -1.48 | 0.89 | 0.38  | -1.07 |
| TY54 | -0.70 | -0.63 | -0.19 | -0.09 | -1.24 | 1.68 | 0.84  | -0.20 |

---
